# Supplementary material for: Suzuki–Miyaura cross coupling reaction: recent advancements in catalysis and organic synthesis
Source: Royal Society of Chemistry journal article supplement (doi:10.1039/d0cy02059a), 2021-01-01
Supplement: d0cy02059a1.pdf [file d0cy02059a1.pdf]

## **Suzuki-Miyaura cross coupling reaction: Recent advancements in catalysis and organic synthesis**

**Brijesh S. Kadu\***

Novartis Healthcare Pvt. Ltd., Plot No.4, Survey No. 101 and 101/2, Lalgadi Mallakpet,  
Shamirpet, Hyderabad, India – 500101

E-mail: [brijesh.kadu@novartis.com](mailto:brijesh.kadu@novartis.com); [brijesh\\_kadu@yahoo.co.in](mailto:brijesh_kadu@yahoo.co.in)

Phone: (+91)-9850096486

Total no. of Figures – 07

Total no. of pages - 09

**Scheme S1:** Putative catalytic cycles for the alkyne/Suzuki Reaction. Reprinted (adapted) with permission from Ref. 1.

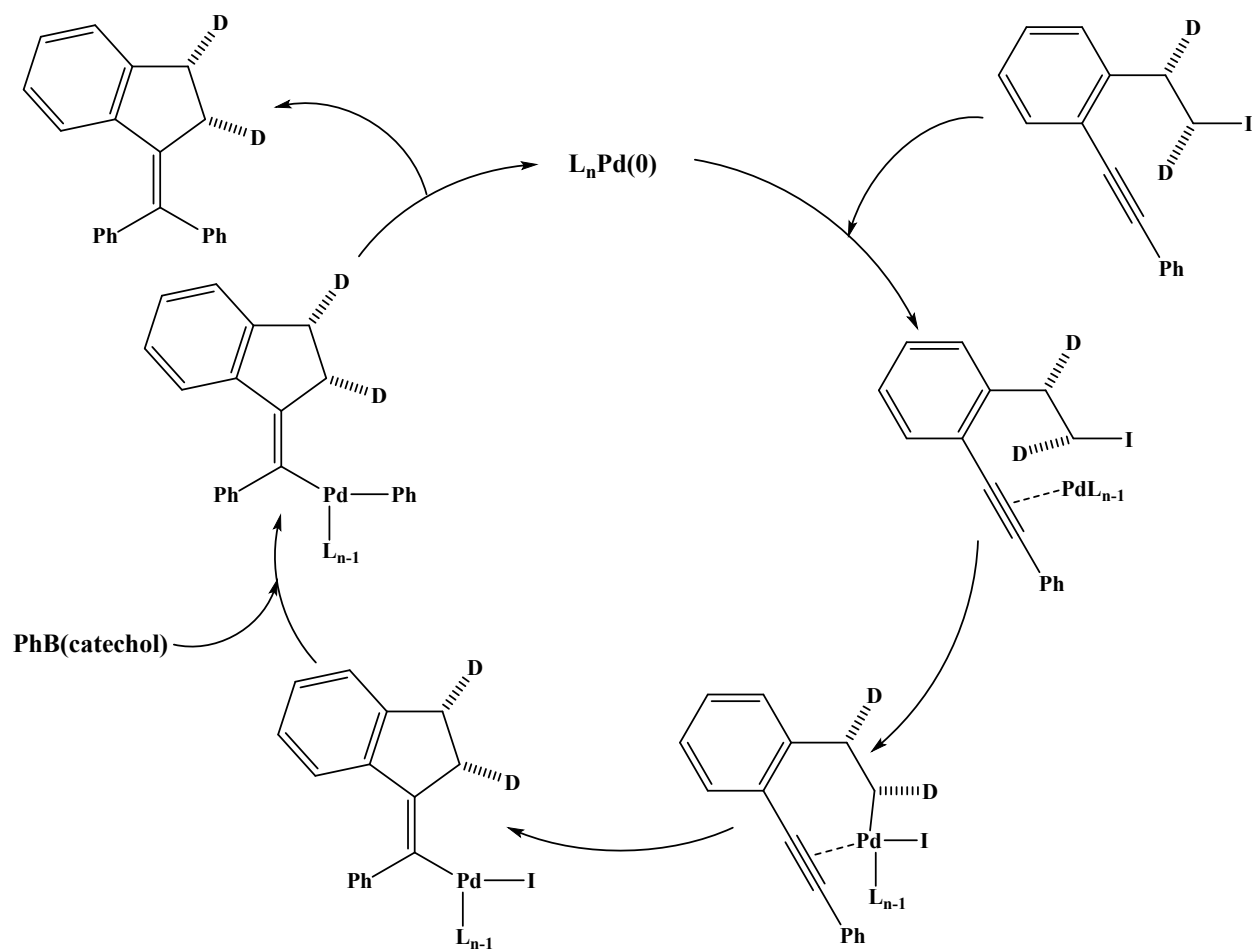

**Scheme S2:** Proposed Mechanism of Suzuki–Miyaura CrossCoupling of Aryl Carbamates and Aryl Sulfamates. Reprinted (adapted) with permission from Ref. 2.

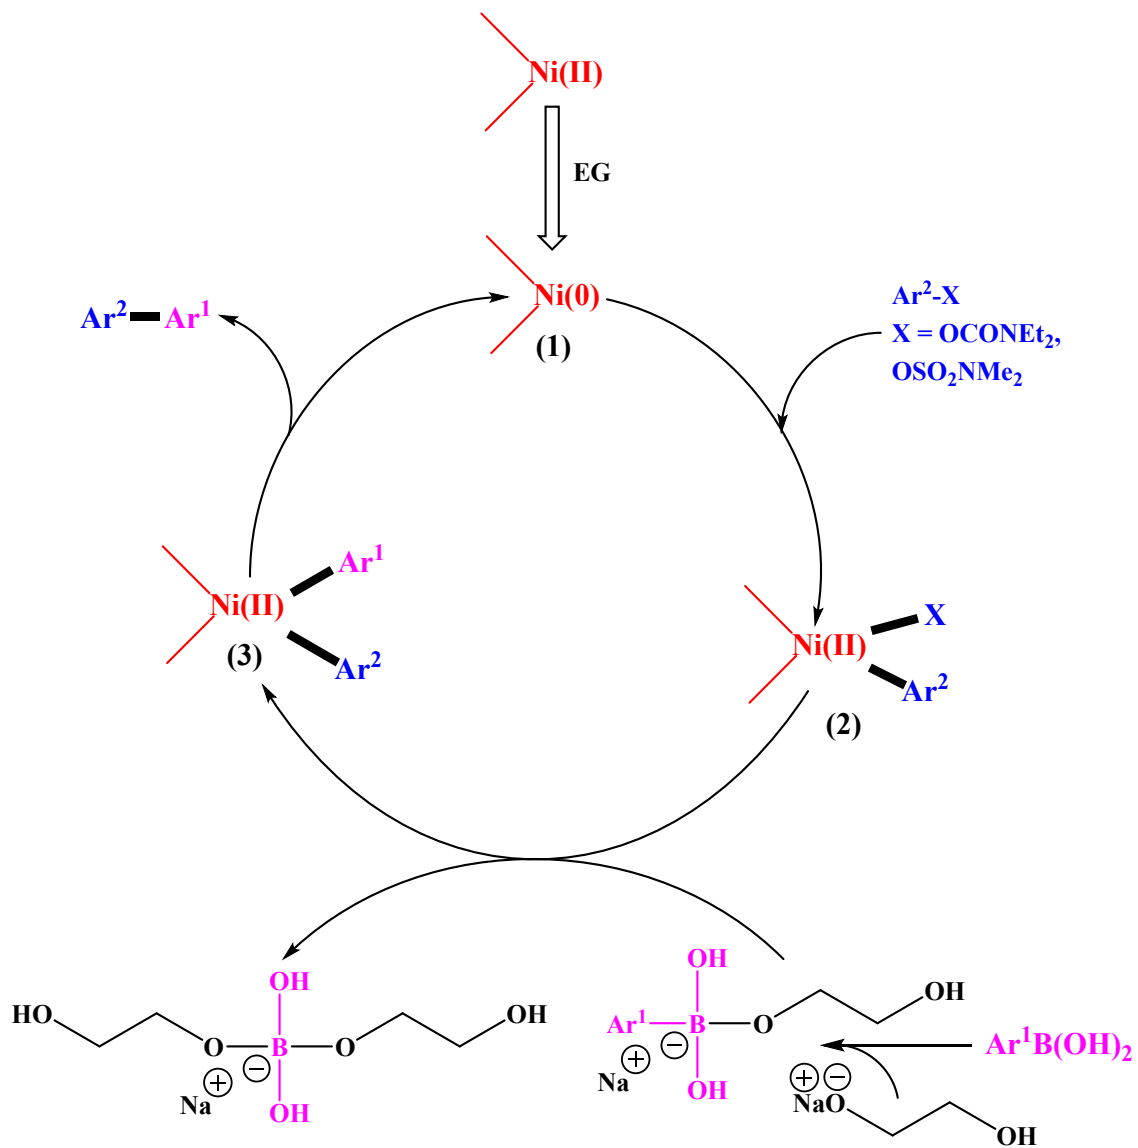

**Scheme S3:** Proposed mechanisms for CuI catalyzed cross-coupling of organoboronic acids with 1,1-dibromo-1-alkenes. Reprinted (adapted) with permission from Ref. 3.

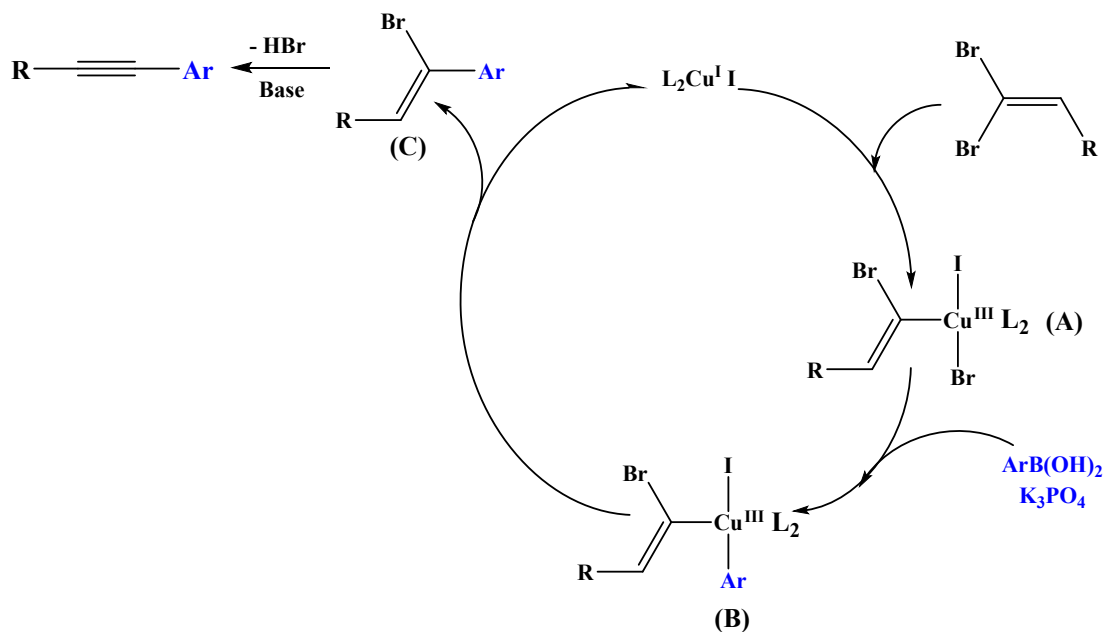

**Mechanism I**

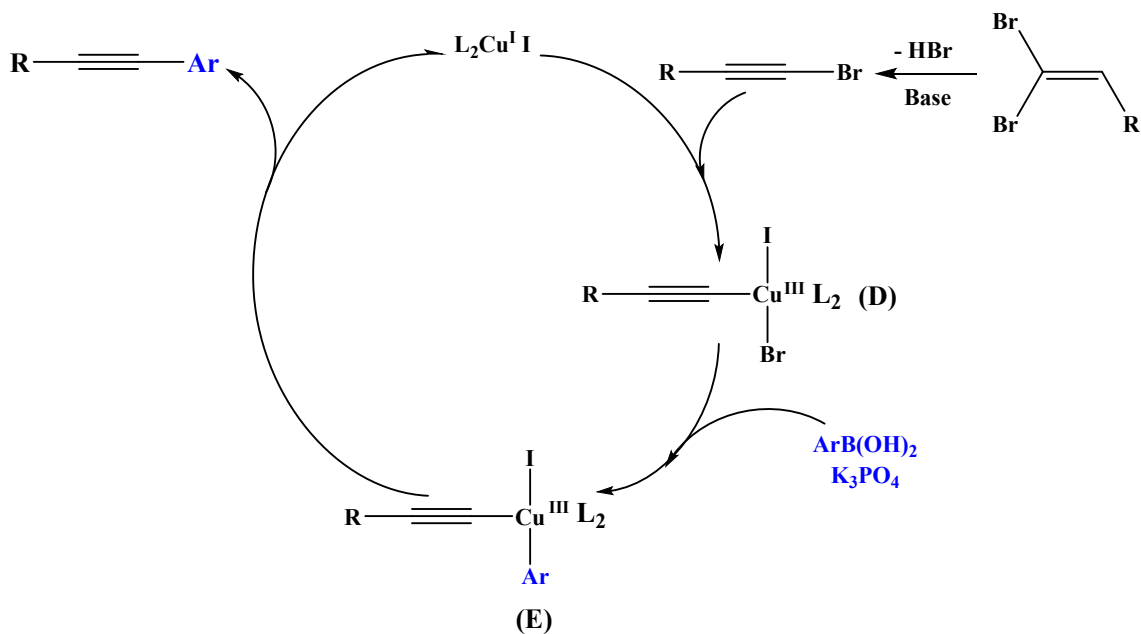

**Mechanism II**

**Scheme S4:** Plausible mechanism for the synthesis of isoindolinones. Reprinted (adapted) with permission from Ref. 4.

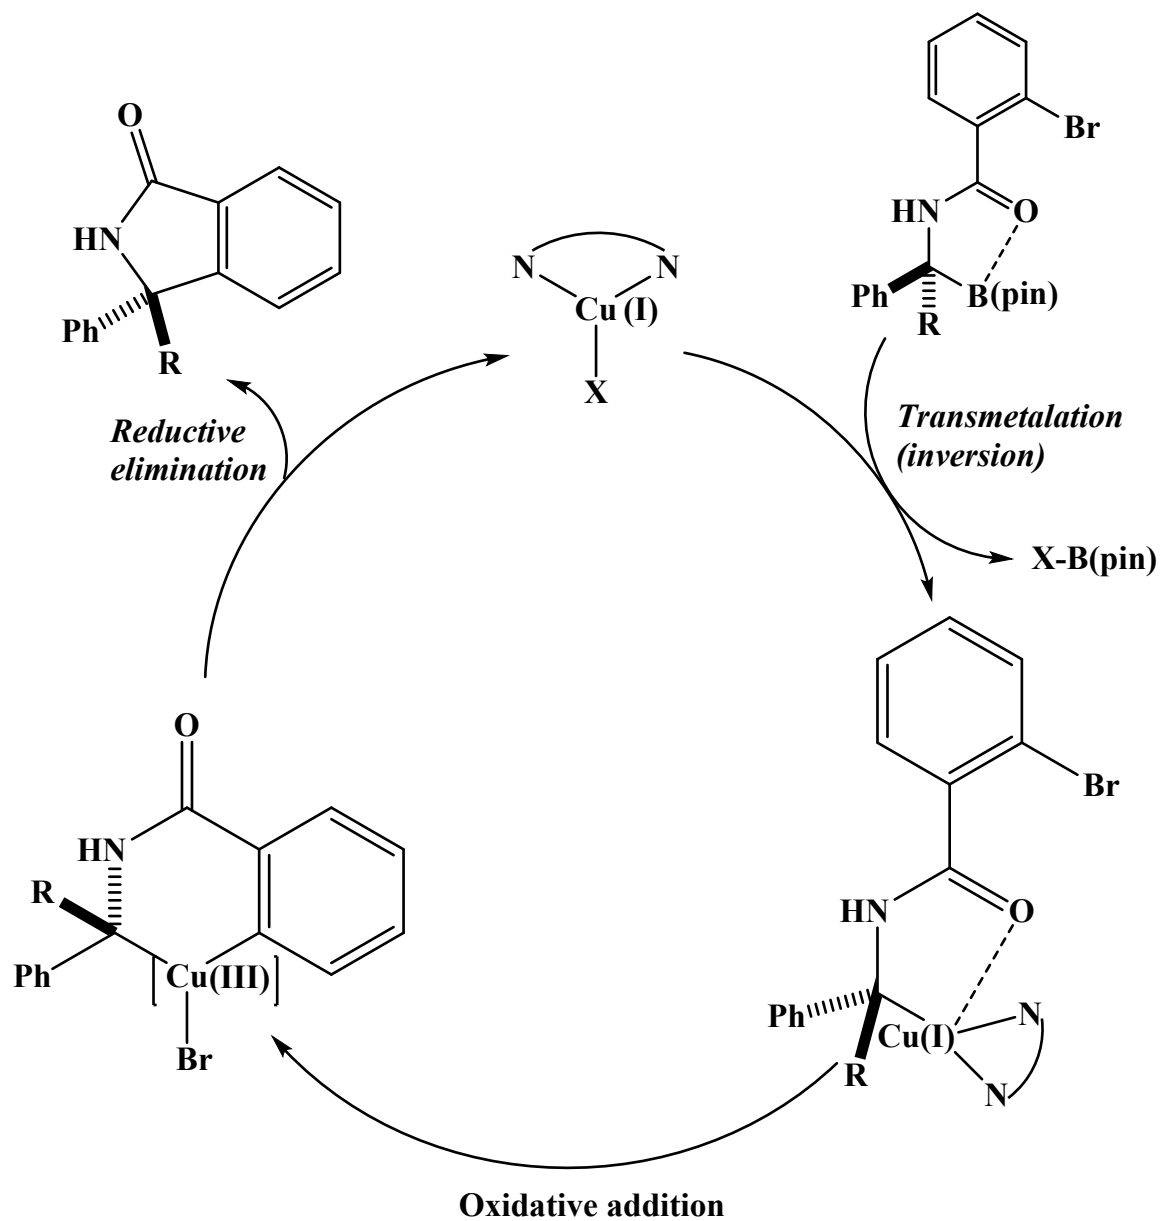

**Scheme S5:** Plausible mechanism for alkylarylation of vinylarenes with arylboronic acids and cycloalkylsilyl peroxides. Reprinted (adapted) with permission from Ref. 5.

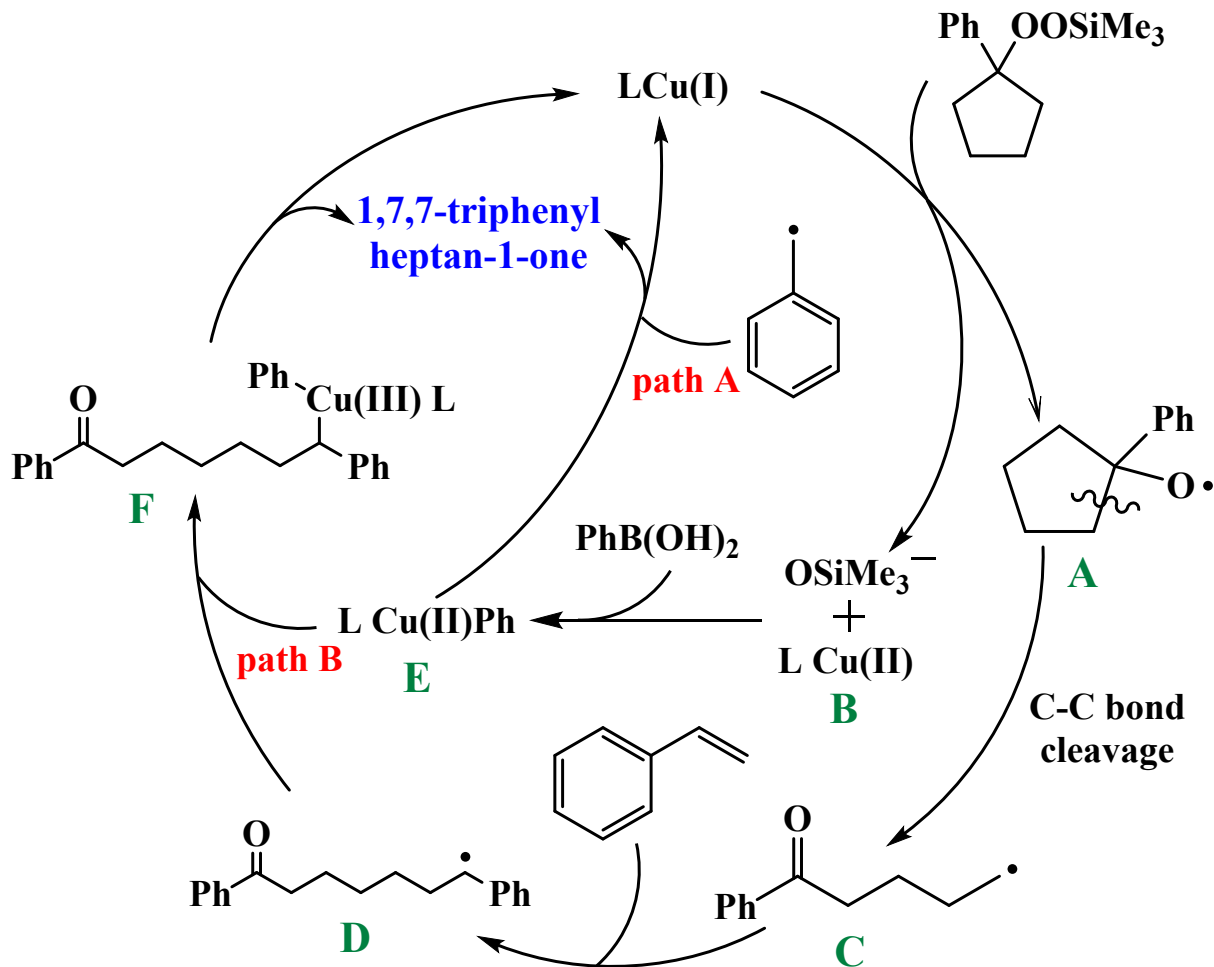

**Scheme S6:** Plausible mechanism for Co catalyzed SMCR of aryl halide and phenylboronic acid, Reprinted (adapted) with permission from Ref. 6.

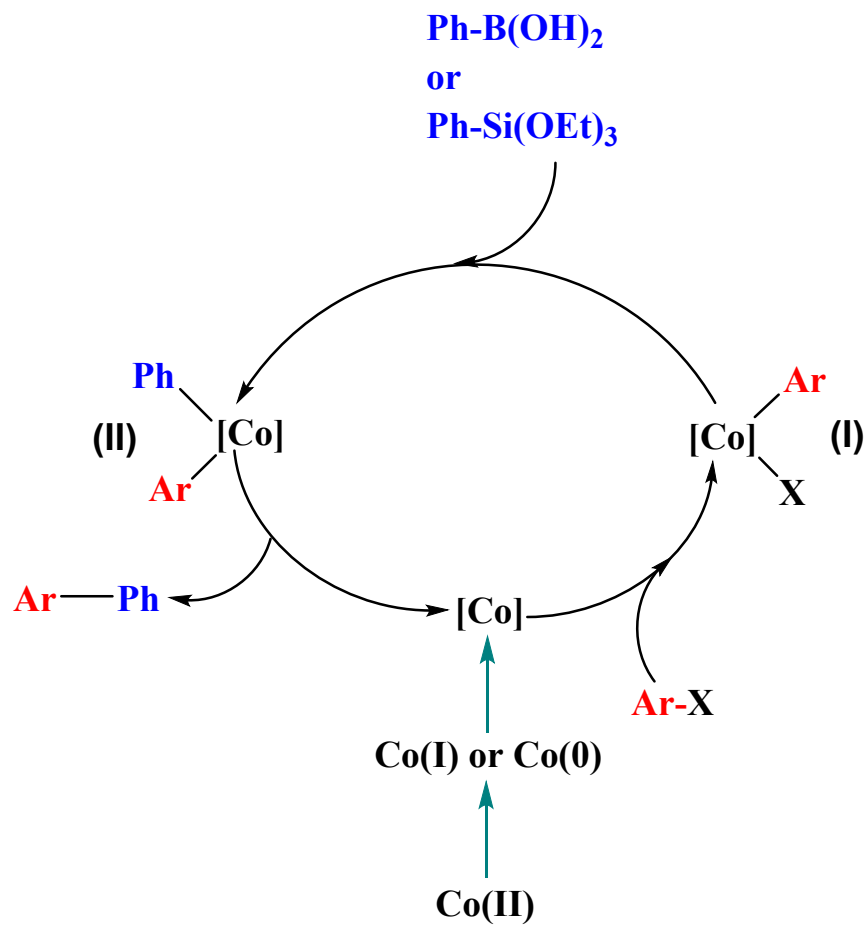

**Scheme S7:** Iron(II) chloride-diphosphine complex catalyzed SMCR of lithium arylborates react and primary and secondary alkyl halides, Reprinted (adapted) with permission from Ref. 7.

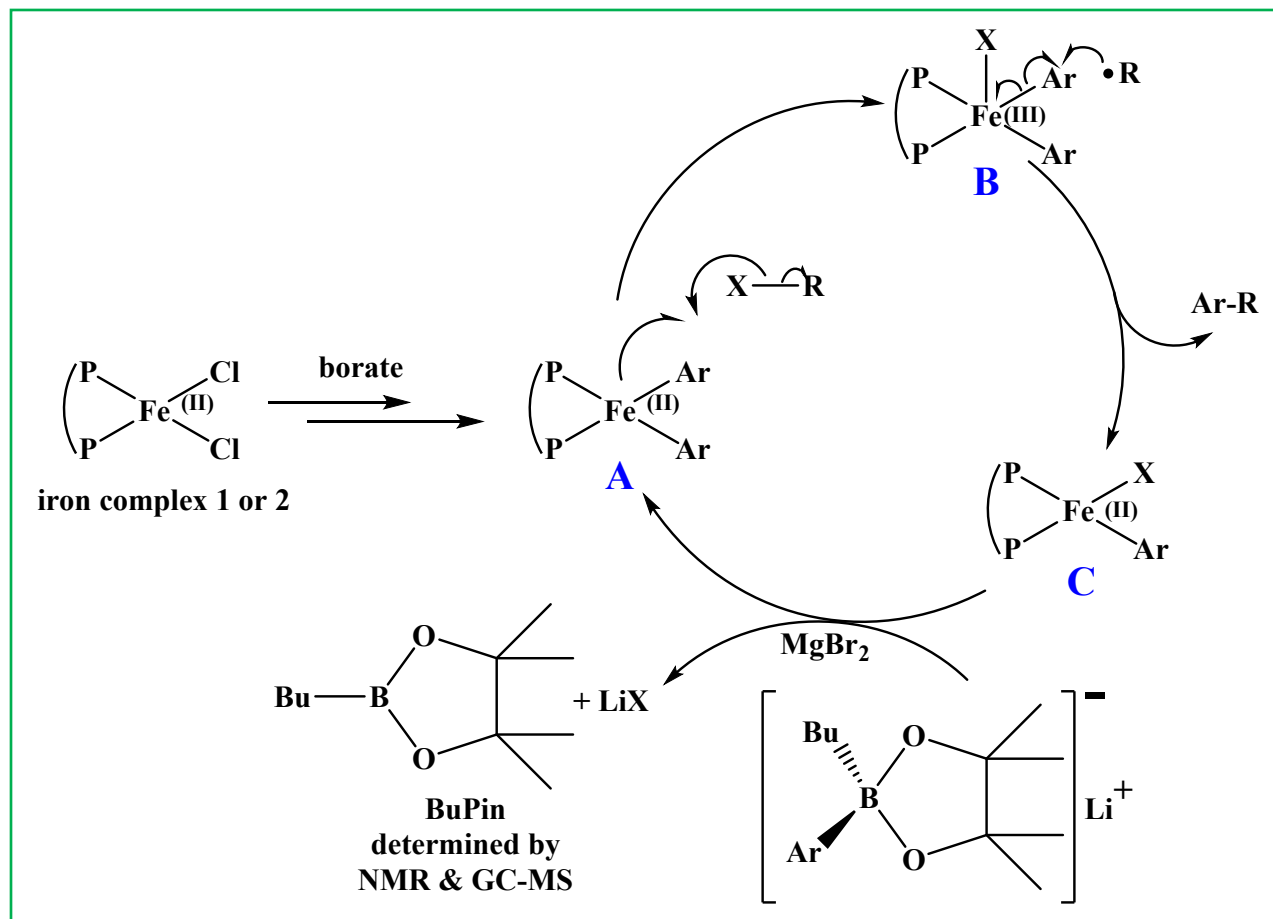



## References:

- 1 B. Monks and S. Cook, *J. Am. Chem. Soc.*, 2012, **134**, 15297-15300.
- 2 I. Inaloo, S. Majnooni, H. Eslahi and M. Esmaeilpour, *ACS Omega*, 2020, **13**, 7406-7417.
- 3 J. Liu, F. Dai, Z. Yang, S. Wang, K. Xie, A. Wang and X. Chen, *Tet. Lett.*, 2012, **53**, 5678-5683.
- 4 Y. Yoshinaga, T. Yamamoto and M. Suginome, *Angew. Chem. Int. Ed.*, 2020, **59**, 7251 – 7255.
- 5 S. Yang, P. Gao, M. Suo, S. Gao, X. Duan and L. Guo, *Chem. Commun.*, 2020, **56**, 10714-10717.
- 6 S. Sobhani, H. Moghadam, J. Skibsted and J. Sansano, *Green Chem.*, 2020, **22**, 1353-1365.
- 7 T. Hatakeyama, T. Hashimoto, Y. Kondo, Y. Fujiwara, H. Seike, H. Takaya, Y. Tamada, T. Ono and M. Nakamura, *J. Am. Chem. Soc.*, 2010, **132**, 10674-10676.
